# Supplementary material for: Cystathionine γ-lyase is expressed in human atherosclerotic plaque microvessels and is involved in micro-angiogenesis
Source: PubMed Central journal article supplement (PMC5052587; doi:10.1038/srep34608), 2016-10-06
Supplement: srep34608-s1.pdf [file srep34608-s1.pdf]

**Cystathionine  $\gamma$ -lyase is expressed in human atherosclerotic plaque microvessels and is involved in micro-angiogenesis**

J.C. van den Born, MD; R. Mencke, BSc; S. Conroy, MSc; C.J. Zeebregts, MD PhD; H. van Goor, PhD; and J.L. Hillebrands, PhD

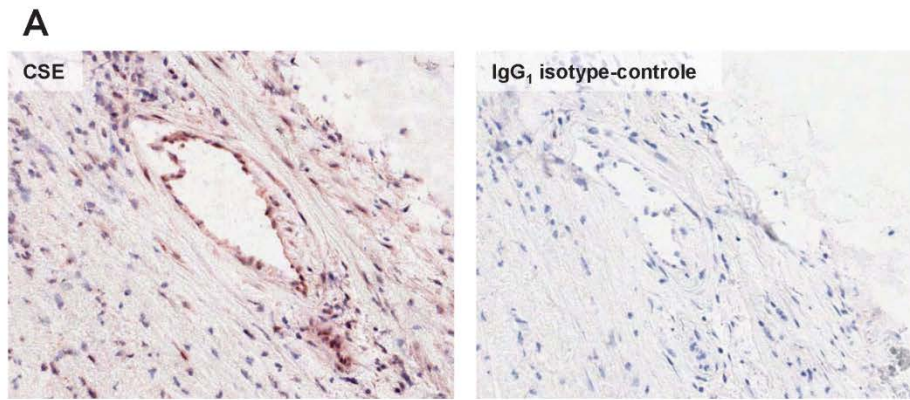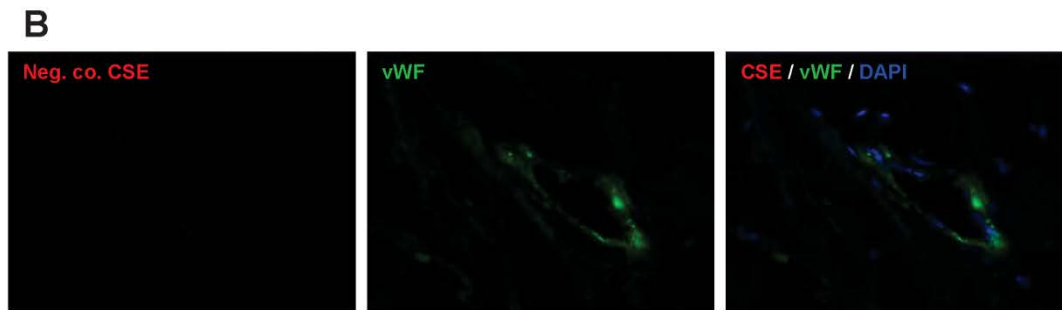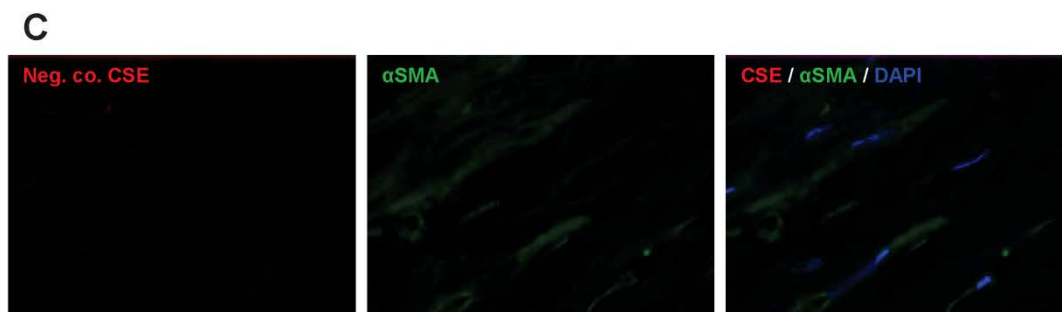

**Supplemental figure 1: Negative control immunohistochemical and immunofluorescence stainings.**

Positive signal (intraplaque microvessel) and negative control of carotid endarterectomy plaque for CSE staining. First antibody was replaced by isotype control (mouse IgG<sub>1</sub> monoclonal), normal staining protocol was further applied (A). Negative control staining of CSE/vWF double immunofluorescence staining (B) and CSE/αSMA double immunofluorescence staining (C) was performed, only vWF or αSMA antibody was used, and CSE antibody was replaced by PBS supplemented with 1% bovine serum albumin. Staining protocol was applied as described. 400x magnification.

**A**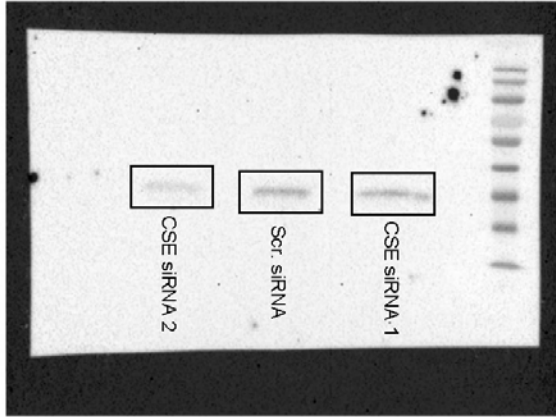**B**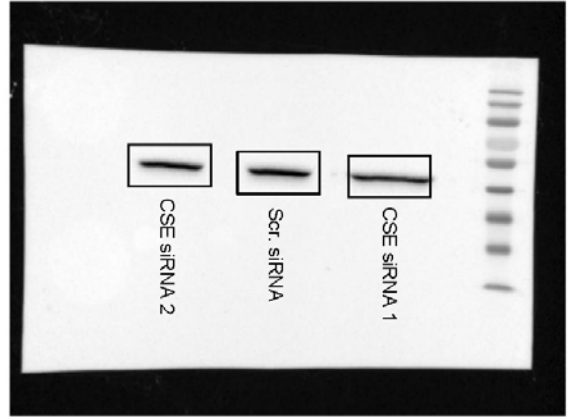**C**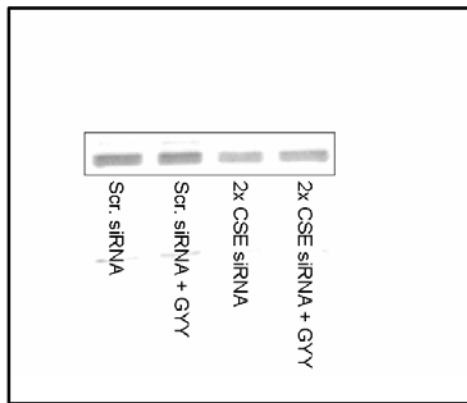**D**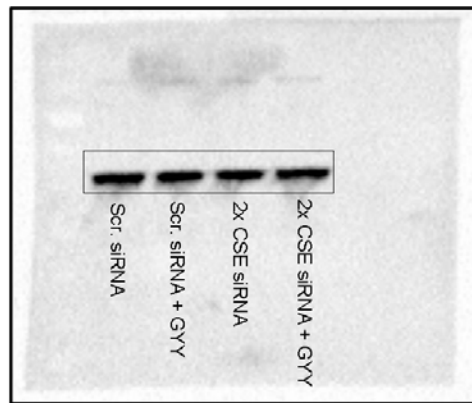

**Supplemental figure 2: Original scans of western blots.**

Unprocessed original scans of western blots of siRNA-treated HMEC-1 for CSE (A) and  $\beta$ -actin (B). Original scans of western blots of HMEC-1 cells after siRNA silencing and/or GYY4137 treatment, for CSE (C) and  $\beta$ -actin (D). Marked bands were used for figure 4.

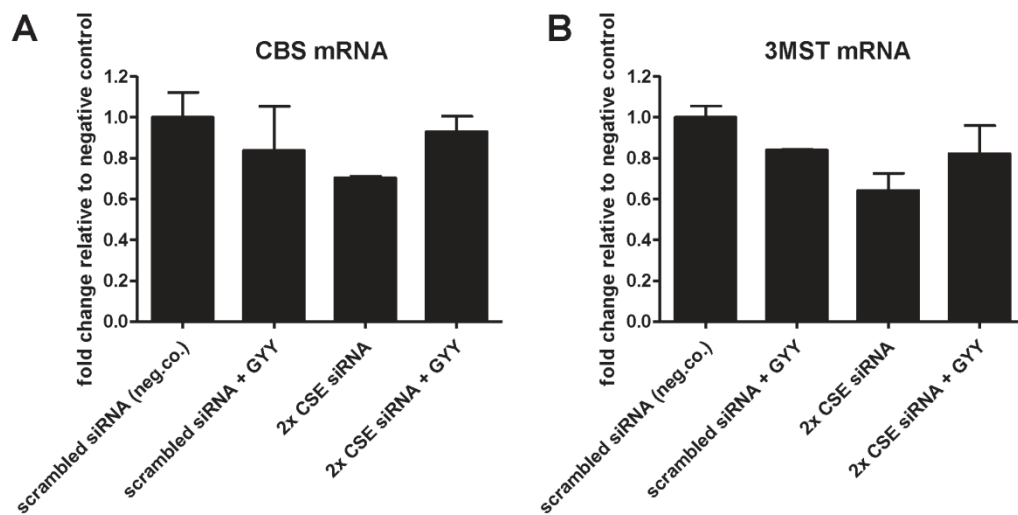

**Supplemental figure 3: No differences in CBS and 3MST mRNA expression with siRNA CSE silencing.**

Real-time PCR analysis revealed no differences in CBS (A) and 3MST (B) mRNA expression levels in HMEC-1 cells after siRNA silencing of CSE and addition of slow release H<sub>2</sub>S compound GYY4137. n=3, in which each replicate was performed in triplicate.

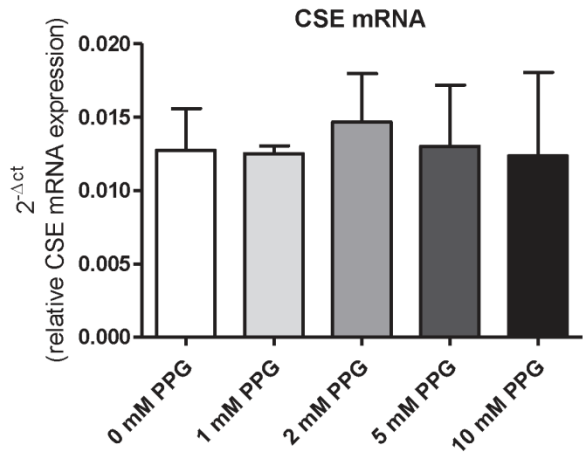

**Supplemental figure 4: No differences in CSE mRNA expression during inhibition of CSE activity with PPG.**

Real-time PCR analysis revealed no differences in CSE mRNA expression levels in HMEC-1 cells with different concentrations of PPG treatment. n=3, in which each replicate was performed in triplicate.
